# Supplementary material
Source: publisher figshare collection journal article supplement (https://acs.figshare.com/ndownloader/files/5037367)
Supplement: Supplementary file 1 [file 5037367]

## Supporting Information

### An Efficient and Cost Effective Way for Conversion of Potassium Nitrate from Potassium Chloride using Electro-dialysis

Prem P. Sharma<sup>a,b</sup>, Swati Gahlot<sup>a</sup>, Abhishek Rajput<sup>a</sup>, Rajesh Patidar<sup>a</sup>, Vaibhav Kulshrestha<sup>\*a,b</sup>

<sup>a</sup>CSIR-Central Salt and Marine Chemicals Research Institute (CSIR-CSMCRI),  
Council of Scientific & Industrial Research (CSIR), Gijubhai Badheka Marg,  
Bhavnagar- 364 002, (Gujarat), INDIA

<sup>b</sup> Academy of Scientific and Innovative Research,  
CSIR-Central Salt and Marine Chemicals Research Institute (CSIR-CSMCRI), Council of Scientific & Industrial  
Research (CSIR), Gijubhai Badheka Marg, Bhavnagar- 364 002, (Gujarat), INDIA  
E-mail: [vaibhavk@csmcri.org](mailto:vaibhavk@csmcri.org), [vaihavphy@gmail.com](mailto:vaihavphy@gmail.com)

#### S1. Chemical and Structural Characterization:

The Fourier-transform infrared (FTIR) spectra of membranes is recorded using KBr pellet method with a spectrum GX series 49387 spectrometer in the frequency range 4000-400 cm<sup>-1</sup>. Surface characterization of membrane are recorded by scanning electron microscopy (SEM) using LEO microscope after gold sputter coating.

#### S2. Thermo-mechanical stabilities

Investigation of thermal degradation of membranes were done on thermogravimetric analyser (TGA) under N<sub>2</sub> atmosphere on Mettler Toledo TGA/SDTA851e with stare software, with a heating rate of 10 °C/min from 50 to 600°C. The glass transition behavior of composite membranes was assessed through Differential Scanning calorimetry (DSC) using Mettler Toledo DSC822e thermal analyzer with stare software under temperature range 0 to 200°C. Dynamic mechanical stabilities of the membranes was carried out on Mettler Toledo dynamic mechanical analyzer (DMA) 861c instrument with stare software under nitrogen environment with a heating rate of 5°C/min from 30 to 450°C with 1 Hz frequency. Stress-strain property of membrane samples (2.5 cm long, 0.5 cm width 0.15 mm thick) is determined using Zwick Roell Z2.5 tester. The testXpert II -V3.5 software was used for data analysis. Measurements are carried out with 3 samples, whose average is reported.

#### S3. Physiochemical Characterization

##### *Ion exchange capacity*

IEC was determined by acid base titration by immersing the membranes in 0.1M NaCl for 24h at room temperature, washed with water and then 10 cm<sup>3</sup> solution was titrated against 0.01M NaOH. The IEC was evaluated by the following equation:

$$IEC(\text{mequiv } g_{dry}^{-1} \text{ membrane}) = \frac{C_{Na^+} V_{sol}}{W_{dry}}$$

where  $C_{Na^+}$  is the concentration of  $Na^+$  in the extraction solution,  $V_{sol}$  is the volume of titrated or consumed NaOH and  $W_{dry}$  is the dried membrane weight.

### ***Proton Conductivity Measurements at different temperature***

All the membranes are equilibrated in water at room temperature. Membrane resistance measurements for each membrane are performed. The spectrum is obtained as complex impedance with imaginary component of  $Z''$  and real component of  $Z'$ . Membrane resistance was obtained from Nyquist plot by fit and simulation method. Proton conductivity was calculated from the following equation:

$$\kappa_m (\Omega^{-1} \text{ cm}^{-1}) = \frac{L (\text{cm})}{R (\Omega) \times A (\text{cm}^2)}$$

where L is the distance between the electrodes used to measure the potential, R is the resistance of the membrane, and A is the surface area of the membrane.

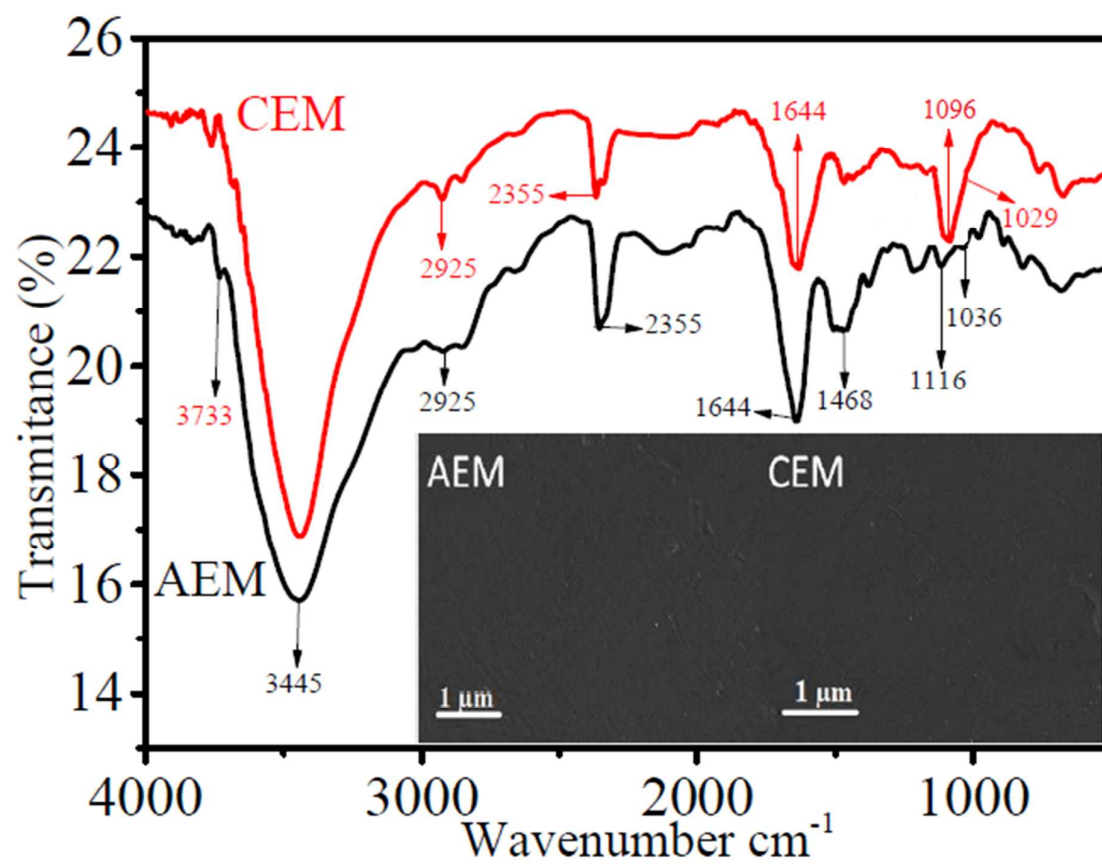

**Fig. S 1:** FTIR spectra SEM images of for ion exchange membranes.
